# Supplementary material for: Using behaviour change theory to train health workers on tobacco cessation support for tuberculosis patients: a mixed-methods study in Bangladesh, Nepal and Pakistan
Source: Springer Nature journal article supplement (doi:10.1186/s12913-019-3909-4), 2019-01-25
Supplement: MOESM5 [file 16421164]

**Project Title:** Tobacco Cessation within TB Programmes – Development and Feasibility (WP1)

## **Central-Level NTP Staff and National-Level Stakeholders Semi-Structured Interview Guide**

**Welcome and thank you for making time for this interview.**

### **Purpose and Format of the Interview:**

As you may be aware, we are conducting an official study in collaboration with the National TB Programme and T&T on providing support for people with Tuberculosis (TB) who smoke and wish to quit smoking. We would like to ask you some questions about tobacco cessation and TB services in your {Nepal/Bangladesh/Pakistan}, and are particularly interested in your views on how best we can help TB patients quit smoking. We are appreciative of your giving us time and would request as thorough responses as possible.

### **National Level Commitment to Tobacco Cessation**

1. What do you think are the current priorities for the National TB programme?
2. Please can you tell me about any existing policies and programmes within Ministry of Health, including the National TB programme that have an element of tobacco cessation included within them?
3. How valuable do you think it would be to add tobacco cessation to routine TB services?
4. Do you think there is momentum to address tobacco cessation within central government? If so, where has this come from? (probe on donor, civil society, media, research evidence or any other possible influences)
5. Do you think there are any obstacles to address tobacco cessation within the central government? If so, what are they? (probe on pressure or inducement from tobacco company employees)
6. Do you think other forms of tobacco (hookah, chewing tobacco) should be addressed within the TB programme?
7. What is the involvement of your organisation (if any) on tobacco?
8. Are there any MoHP/NTP programmes which you believe could and should have an element of tobacco cessation included within them?
9. As far as you know, are there any financial resources available within the health system for tobacco cessation - in the TB programme, or others? Are any NGOs or donors implementing or supporting tobacco cessation programmes anywhere in the country?
10. What challenges would be faced at central, district and health facility level to enable the delivery of cessation programmes? (Probe on training, monitoring, supervision, resources, time availability of health professionals and the layout of facilities)
11. Is tobacco part of any routine recording, reporting, monitoring or supervision mechanisms? If not, do you think this would be a useful and feasible addition?

## **Implementation Challenges at District and Facility Level**

12. What challenges would be faced at central, district and health facility level to enable the delivery of cessation programmes? (Probe on training, monitoring, supervision, resources, time availability of health professionals and the layout of facilities)
13. Is tobacco part of any routine recording, reporting, monitoring or supervision mechanisms? If not, do you think this would be useful and feasible addition?
14. What do you think is the best way forward to integrate tobacco cessation into the health system and TB programmes in particular? Do you think tobacco cessation should be offered to only TB patients? Is it feasible to offer to other patients?
15. At what level of facility do you think tobacco cessation services should be offered? (e.g. district hospital, PHC, or community clinic/health post)
16. Do you think DOTS facilitators/health professionals need any additional skills to deliver tobacco cessation? What is the best way of increasing skills in this area?
17. What future plans are there for tobacco cessation in terms of policy making and implementation?
18. Is there anything else you would like to say about tobacco cessation?

### **Get feedback on the key points and clarify anything you are unsure of.**

Thank you for your time today. This is the end of the discussion. I will now turn off the recorder.
